# Supplementary material
Source: PubMed Central journal article supplement (PMC8501518)
Supplement: mmc6.pdf [file mmc6.pdf]

# Finland

- SS1** = C<sup>8782</sup>T, T<sup>28144</sup>C
- SS2** = G<sup>26144</sup>T
- SS3** = G<sup>11083</sup>T
- SS2B** = G<sup>26144</sup>T, G<sup>11083</sup>T
- SS4** = C<sup>241</sup>T, C<sup>3037</sup>T A<sup>23403</sup>G
- Black** = unclassified/ambiguous

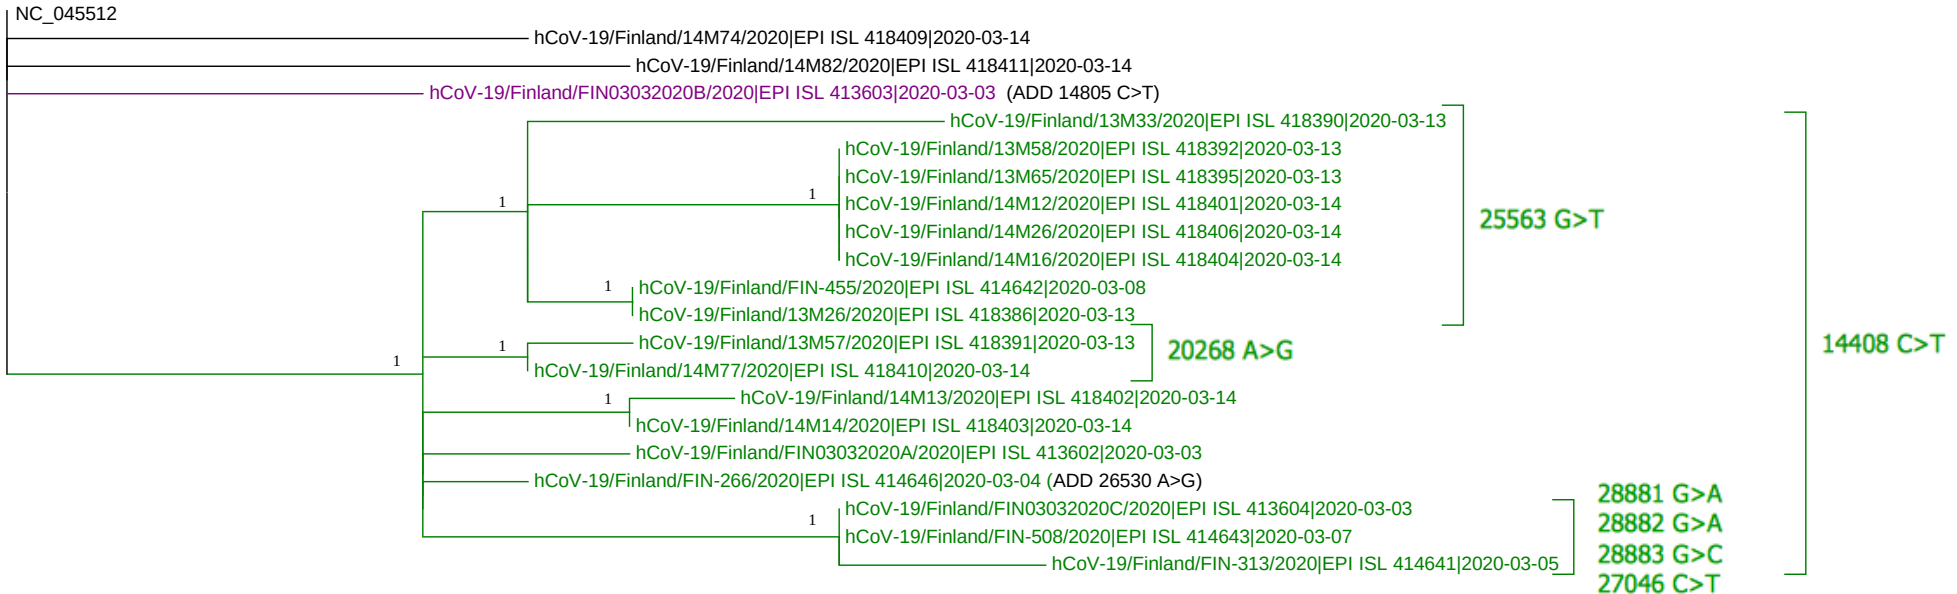

0.00002
