# Supplementary material
Source: PubMed Central journal article supplement (PMC8501518)

# Italy

**SS1** = C<sup>8782</sup> T, T<sup>28144</sup> C  
**SS2** = G<sup>26144</sup> T  
**SS3** = G<sup>11083</sup> T  
**SS2B** = G<sup>26144</sup> T, G<sup>11083</sup> T  
**SS4** = C<sup>241</sup> T, C<sup>3037</sup> T, A<sup>23403</sup> G  
**Black** = unclassified/ambiguous

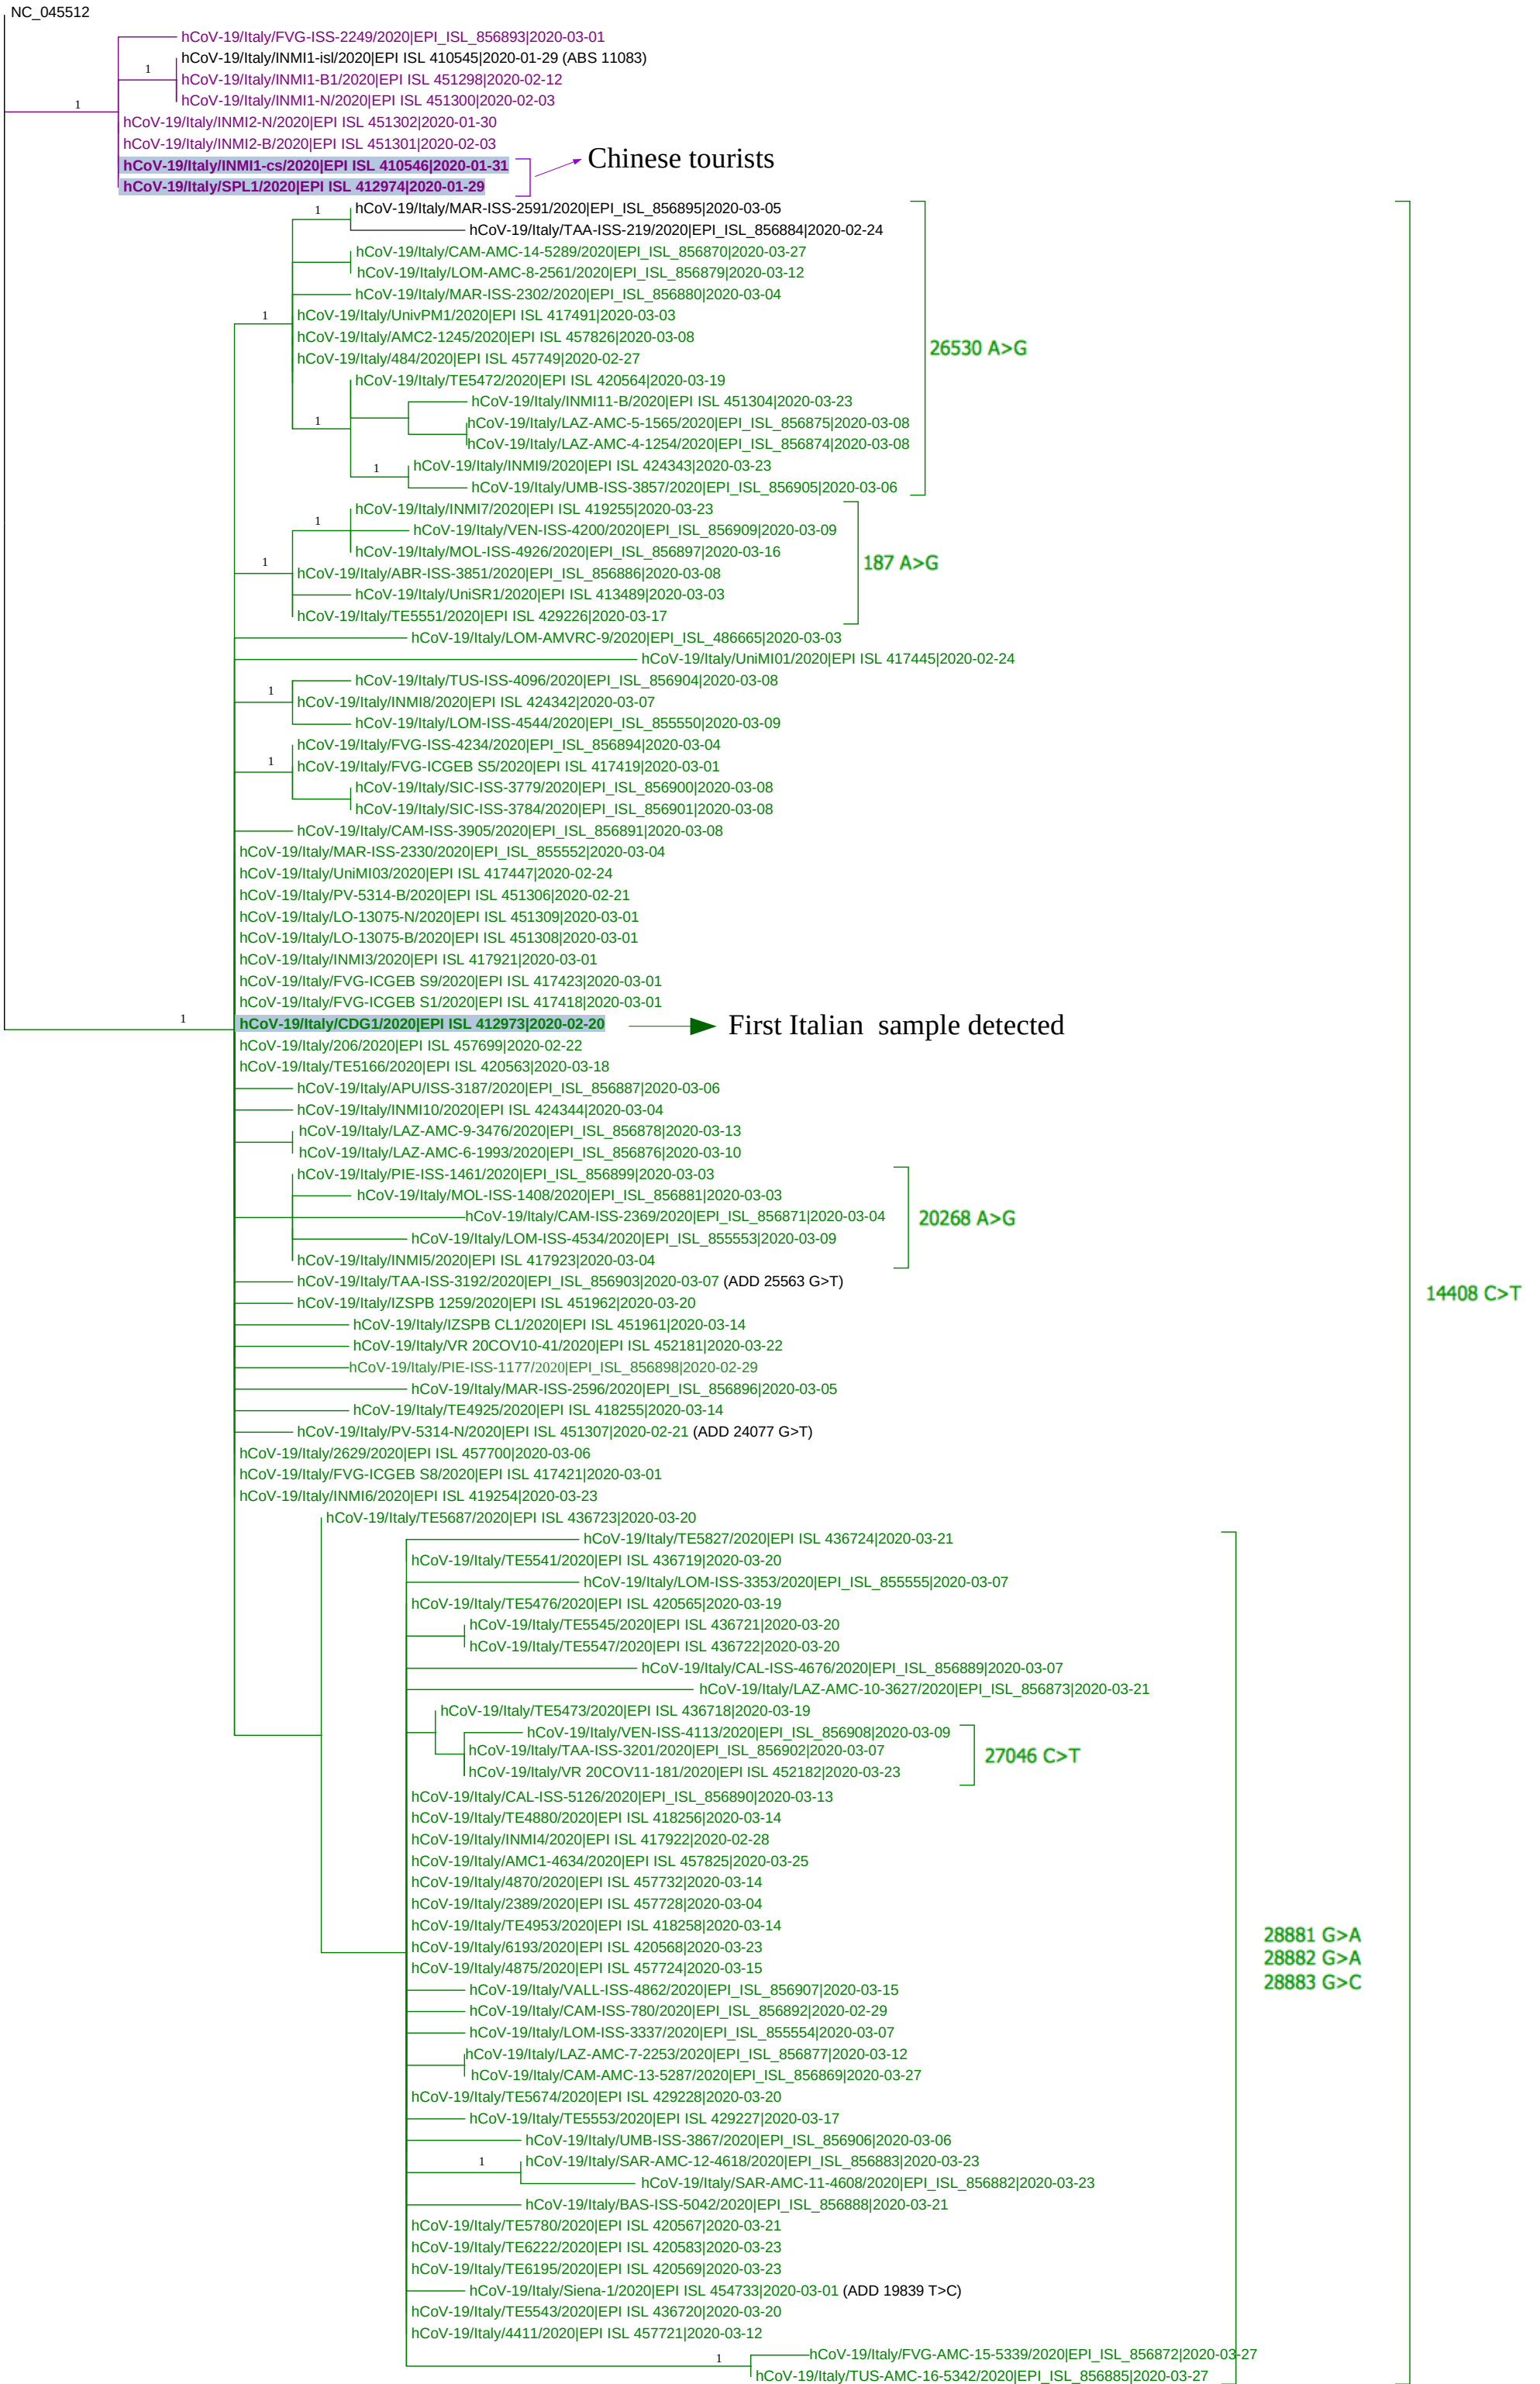

Supplement: mmc12.pdf [file mmc12.pdf]
