# Supplementary material
Source: PubMed Central journal article supplement (PMC8501518)

# The Netherlands

SS1 = C<sup>8782</sup>T, T<sup>28144</sup>C  
SS2 = G<sup>26144</sup>T  
SS3 = G<sup>11083</sup>T  
SS2B = G<sup>26144</sup>T, G<sup>11083</sup>T  
SS4 = C<sup>241</sup>T, C<sup>3037</sup>T A<sup>23403</sup>G  
Black = unclassified/ambiguous

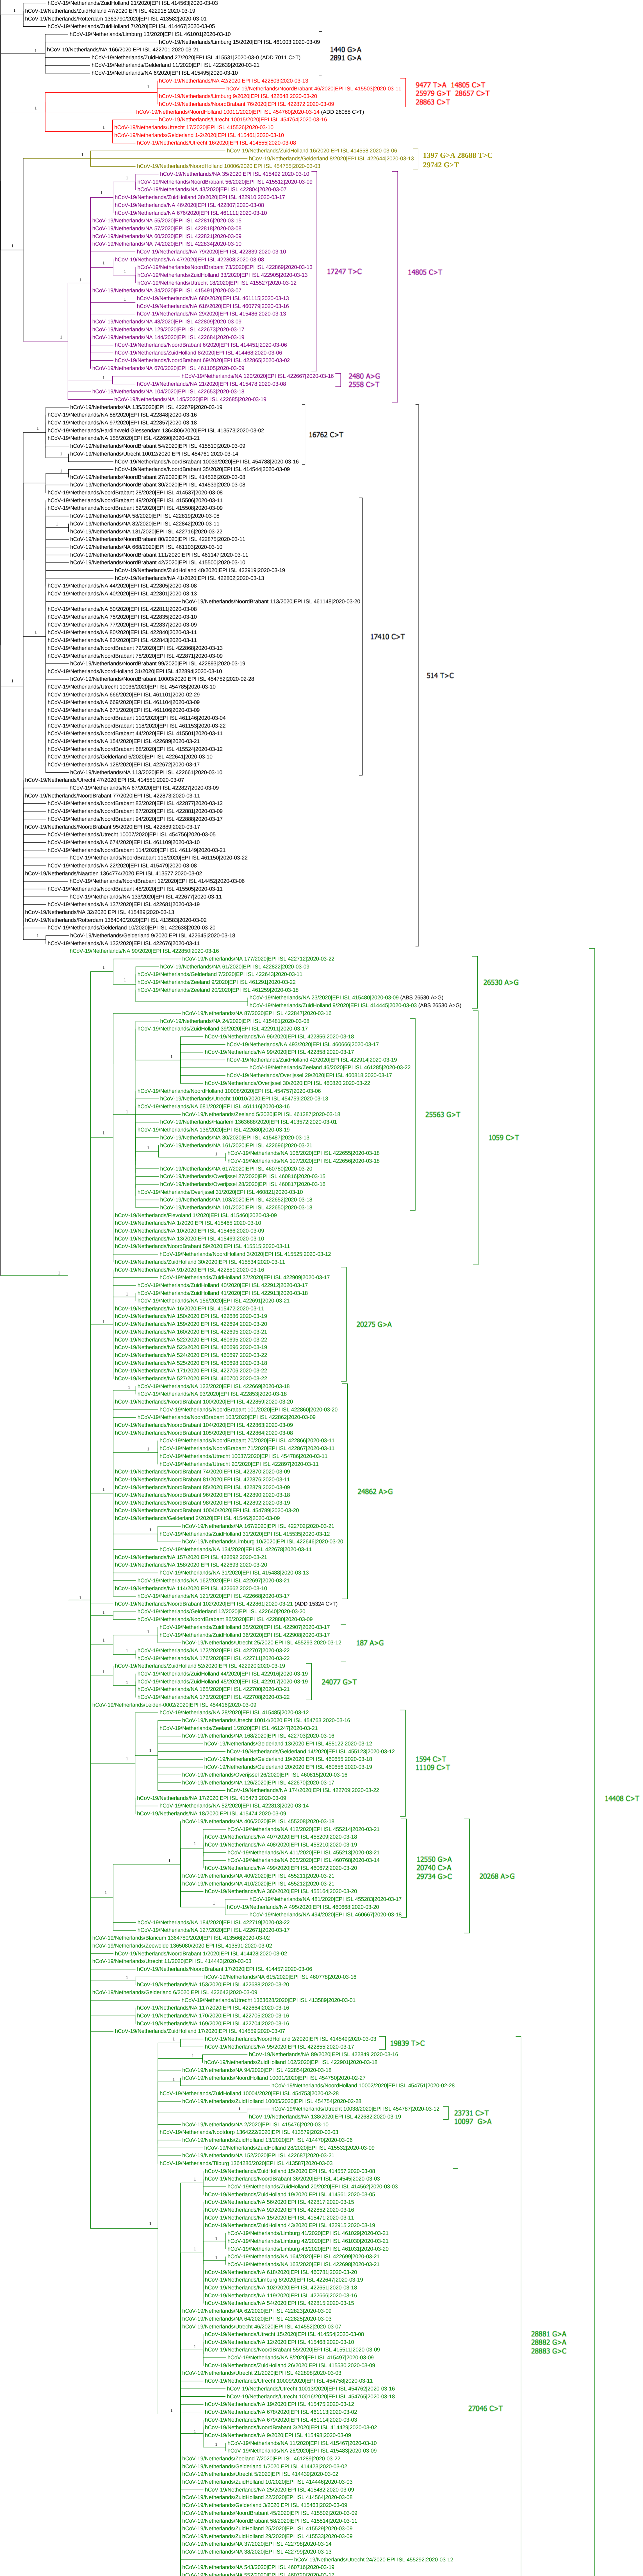

Supplement: mmc17.pdf [file mmc17.pdf]
